# Supplementary material for: Transcriptome Data Reveal Syndermatan Relationships and Suggest the Evolution of Endoparasitism in Acanthocephala via an Epizoic Stage
Source: PubMed Central journal article supplement (PMC3919803; doi:10.1371/journal.pone.0088618), 2014-02-10

Figure S1 - Evolutionary rates of the HaMStR core orthologs and the orthologs contained in the datasets

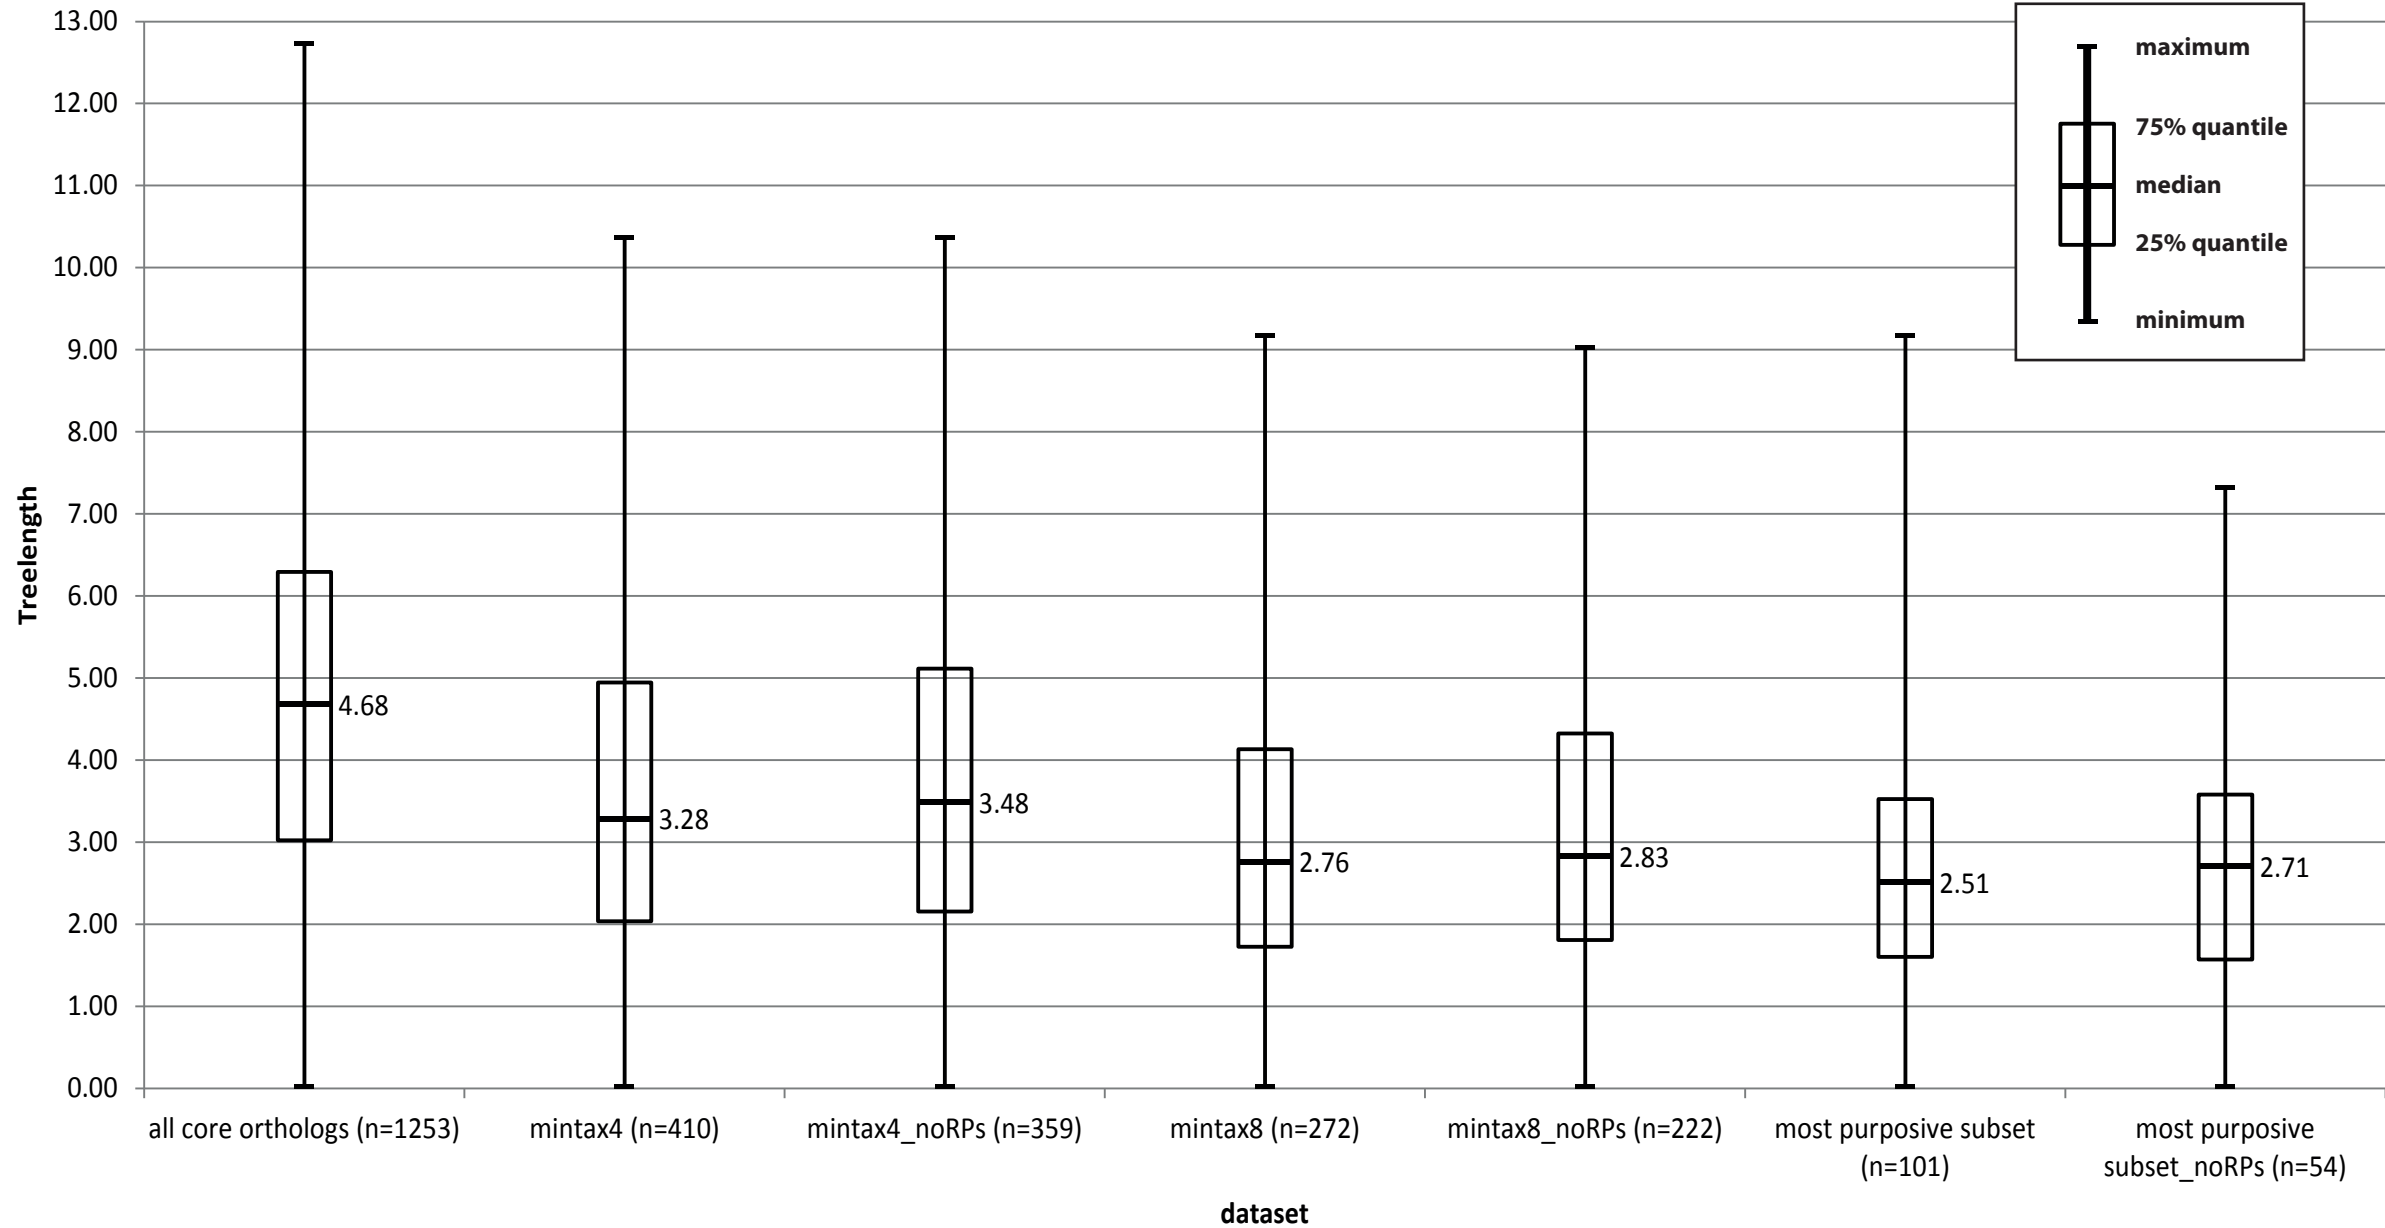

Supplement: pone.0088618.s001.pdf [file pone.0088618.s001.pdf]
