# Supplementary material for: Transcriptome Data Reveal Syndermatan Relationships and Suggest the Evolution of Endoparasitism in Acanthocephala via an Epizoic Stage
Source: PubMed Central journal article supplement (PMC3919803; doi:10.1371/journal.pone.0088618), 2014-02-10
Supplement: pone.0088618.s002.pdf [file pone.0088618.s002.pdf]

**Table S1 – Results of EST processing and assembly**

For all newly sequenced species, the applied sequencing method, total number of sequencing reads, number of reads discarded during pre-processing and total number of cleaned ESTs are given. Reads were discarded during pre-processing if they (i) did not exceed the minimum length of 100 bp after adapter and quality trimming, (ii) contained more than 3% of undetermined bases, (iii) were mainly of low complexity, or (iv) other reasons. The cleaned ESTs were assembled using MIRA v3.0.3 or TGICL, the number of contigs, number of single reads as well as the length of the largest contig and N50 size of the assembly are denoted. SC = standard chemistry, TC = Titanium chemistry, n.d. = not determined.

| species              | sequencing method | sequencing reads | processing                      |              | assembly     |         |              |                     |          |
|----------------------|-------------------|------------------|---------------------------------|--------------|--------------|---------|--------------|---------------------|----------|
|                      |                   |                  | discarded during pre-processing | cleaned ESTs | used program | contigs | single reads | largest contig [bp] | N50 [bp] |
| <i>Seison spec.</i>  | 454 (SC)          | 120,822          | 5,668                           | 115,154      | MIRA         | 7,682   | 3,142        | 2,1                 | 483      |
| <i>P. ambiguus</i>   | 454 (TC)          | 101,387          | 4,31                            | 97,077       | MIRA         | 8,264   | 1,561        | 1,801               | 404      |
| <i>A. vaga</i>       | 454 (TC)          | 576,456          | 36,941                          | 539,515      | MIRA         | 15,578  | 3,388        | 2,1                 | 462      |
| <i>B. manjavacas</i> | 454 (SC)          | 108,705          | 20,755                          | 119,512      | TGICL        | 11,629  | n.d.         | 2,102               | 259      |
|                      | Sanger            | 43,584           | 12,022                          |              |              |         |              |                     |          |
