# Supplementary material for: Transcriptome Data Reveal Syndermatan Relationships and Suggest the Evolution of Endoparasitism in Acanthocephala via an Epizoic Stage
Source: PubMed Central journal article supplement (PMC3919803; doi:10.1371/journal.pone.0088618), 2014-02-10
Supplement: pone.0088618.s003.pdf [file pone.0088618.s003.pdf]

**Table S2 - Dataset coverage of single taxa (%amino acid positions, number of proteins)**

| 100%                               | 0%           |              |                   |                   |                             |                                   |  |
|------------------------------------|--------------|--------------|-------------------|-------------------|-----------------------------|-----------------------------------|--|
| Taxon                              | mintax4      | mintax8      | mintax4<br>_noRPs | mintax8<br>_noRPs | most<br>purposive<br>subset | most<br>purposive<br>subset_noRPs |  |
| <i>Adineta vaga</i>                | 20,11        | 29,08        | 13,04             | 18,92             | 58,68                       | 39,42                             |  |
| <i>Aplysia californica</i>         | 65,85        | 76,26        | 61,99             | 71,98             | 85,01                       | 74,43                             |  |
| <i>Brachionus manjavacas</i>       | 48,73        | 61,15        | 43,65             | 54,99             | 72,40                       | 55,59                             |  |
| <i>Brachionus plicatilis</i>       | 85,55        | 93,41        | 84,78             | 93,17             | 92,99                       | 91,29                             |  |
| <i>Dugesia ryukyuensis</i>         | 50,86        | 62,58        | 49,44             | 62,17             | 64,79                       | 61,75                             |  |
| <i>Echinococcus granulosus</i>     | 31,47        | 41,71        | 25,54             | 33,62             | 57,29                       | 33,83                             |  |
| <i>Echinococcus multilocularis</i> | 13,04        | 17,94        | 10,51             | 14,59             | 24,76                       | 13,93                             |  |
| <i>Echinorhynchus truttae</i>      | 14,53        | 19,95        | 13,46             | 19,11             | 24,70                       | 23,26                             |  |
| <i>Euprymna scolopes</i>           | 50,29        | 59,00        | 47,44             | 56,16             | 67,63                       | 63,10                             |  |
| <i>Gnathostomula peregrina</i>     | 17,46        | 26,69        | 11,15             | 17,84             | 46,96                       | 24,89                             |  |
| <i>Macrostomum lignano</i>         | 27,56        | 39,75        | 22,45             | 33,42             | 46,30                       | 27,30                             |  |
| <i>Paraplanocera spec.</i>         | 21,12        | 32,82        | 14,08             | 23,22             | 57,53                       | 33,21                             |  |
| <i>Paratenuisentis ambiguus</i>    | 38,35        | 53,04        | 32,75             | 46,32             | 70,48                       | 55,48                             |  |
| <i>Philodina roseola</i>           | 25,85        | 38,79        | 17,79             | 27,70             | 82,04                       | 70,18                             |  |
| <i>Pomphorhynchus laevis</i>       | 49,38        | 62,00        | 46,03             | 58,57             | 71,17                       | 61,79                             |  |
| <i>Schistosoma mansoni</i>         | 98,75        | 98,75        | 98,73             | 98,72             | 98,93                       | 98,99                             |  |
| <i>Schmidtea mediterranea</i>      | 86,44        | 91,78        | 86,36             | 92,21             | 91,49                       | 88,26                             |  |
| <i>Seison spec.</i>                | 31,44        | 44,50        | 25,26             | 37,02             | 84,91                       | 79,65                             |  |
| <i>Turbanella ambronensis</i>      | 8,67         | 13,26        | 2,98              | 4,64              | 31,48                       | 7,86                              |  |
| <b>average</b>                     | <b>41,34</b> | <b>50,66</b> | <b>37,23</b>      | <b>45,49</b>      | <b>64,71</b>                | <b>52,85</b>                      |  |

| 100%                               | 0%                 |                              |                    |                              |                                        |                                             |  |
|------------------------------------|--------------------|------------------------------|--------------------|------------------------------|----------------------------------------|---------------------------------------------|--|
| Taxon                              | mintax4<br>(n=410) | mintax4<br>_noRPs<br>(n=359) | mintax8<br>(n=272) | mintax8<br>_noRPs<br>(n=222) | most<br>purposive<br>subset<br>(n=101) | most<br>purposive<br>subset_noRPs<br>(n=54) |  |
| <i>Adineta vaga</i>                | 136                | 87                           | 125                | 76                           | 79                                     | 33                                          |  |
| <i>Aplysia californica</i>         | 311                | 260                          | 236                | 186                          | 92                                     | 45                                          |  |
| <i>Brachionus manjavacas</i>       | 270                | 220                          | 217                | 168                          | 89                                     | 43                                          |  |
| <i>Brachionus plicatilis</i>       | 371                | 323                          | 258                | 210                          | 95                                     | 50                                          |  |
| <i>Dugesia ryukyuensis</i>         | 218                | 183                          | 174                | 139                          | 65                                     | 31                                          |  |
| <i>Echinococcus granulosus</i>     | 173                | 128                          | 147                | 102                          | 67                                     | 24                                          |  |
| <i>Echinococcus multilocularis</i> | 70                 | 52                           | 62                 | 44                           | 28                                     | 10                                          |  |
| <i>Echinorhynchus truttae</i>      | 67                 | 54                           | 60                 | 47                           | 29                                     | 16                                          |  |
| <i>Euprymna scolopes</i>           | 263                | 224                          | 200                | 162                          | 77                                     | 42                                          |  |
| <i>Gnathostomula peregrina</i>     | 104                | 63                           | 101                | 60                           | 58                                     | 19                                          |  |
| <i>Macrostomum lignano</i>         | 126                | 87                           | 116                | 77                           | 50                                     | 14                                          |  |
| <i>Paraplanocera spec.</i>         | 101                | 58                           | 100                | 57                           | 61                                     | 19                                          |  |
| <i>Paratenuisentis ambiguus</i>    | 242                | 192                          | 212                | 162                          | 93                                     | 46                                          |  |
| <i>Philodina roseola</i>           | 128                | 78                           | 122                | 72                           | 89                                     | 42                                          |  |
| <i>Pomphorhynchus laevis</i>       | 232                | 188                          | 188                | 144                          | 78                                     | 36                                          |  |
| <i>Schistosoma mansoni</i>         | 410                | 359                          | 272                | 222                          | 101                                    | 54                                          |  |
| <i>Schmidtea mediterranea</i>      | 360                | 313                          | 252                | 205                          | 95                                     | 49                                          |  |
| <i>Seison spec.</i>                | 175                | 127                          | 157                | 110                          | 101                                    | 54                                          |  |
| <i>Turbanella ambronensis</i>      | 59                 | 23                           | 58                 | 22                           | 43                                     | 8                                           |  |
| <b>average</b>                     | <b>201</b>         | <b>159</b>                   | <b>161</b>         | <b>119</b>                   | <b>73</b>                              | <b>33</b>                                   |  |
