# Supplementary material for: Transcriptome Data Reveal Syndermatan Relationships and Suggest the Evolution of Endoparasitism in Acanthocephala via an Epizoic Stage
Source: PubMed Central journal article supplement (PMC3919803; doi:10.1371/journal.pone.0088618), 2014-02-10
Supplement: pone.0088618.s004.pdf [file pone.0088618.s004.pdf]

**Table S3 - Assignment of substitution models and composition of the phylogenomic datasets**

| mintax4 | mintax4_slow | mintax8 | most purposive subset | ribosomal protein | <i>C. elegans</i> gene name | corresponding RP | Ortholog ID | Best Model | second best model |
|---------|--------------|---------|-----------------------|-------------------|-----------------------------|------------------|-------------|------------|-------------------|
| X       |              |         |                       |                   |                             |                  | 111209      | LG         | RtREV             |
| X       | X            |         |                       |                   |                             |                  | 111212      | LG         | Blosum62          |
| X       | X            | X       |                       |                   |                             |                  | 111214      | LG         | WAG               |
| X       | X            | X       |                       |                   |                             |                  | 111215      | LG         | RtREV             |
| X       | X            | X       | X                     | X                 | rps-23                      | S23              | 111216      | LG         | RtREV             |
| X       | X            | X       | X                     | X                 | rps-13                      | S13              | 111217      | LG         | JTT               |
| X       | X            | X       |                       |                   |                             |                  | 111222      | LG         | JTT               |
| X       |              |         |                       |                   |                             |                  | 111225      | RtREV      | LG                |
| X       | X            | X       |                       |                   |                             |                  | 111229      | LG         | JTT               |
| X       |              | X       |                       |                   |                             |                  | 111230      | JTT        | LG                |
| X       | X            |         |                       |                   |                             |                  | 111233      | LG         | RtREV             |
| X       | X            | X       |                       |                   |                             |                  | 111237      | LG         | JTT               |
| X       | X            | X       |                       |                   |                             |                  | 111238      | RtREV      | LG                |
| X       |              |         |                       |                   |                             |                  | 111242      | CpREV      | WAG               |
| X       | X            | X       |                       |                   |                             |                  | 111243      | LG         | JTT               |
| X       | X            | X       | X                     |                   |                             |                  | 111249      | LG         | WAG               |
| X       | X            | X       | X                     |                   |                             |                  | 111259      | LG         | WAG               |
| X       |              |         |                       |                   |                             |                  | 111263      | CpREV      | Blosum62          |
| X       |              |         |                       |                   |                             |                  | 111265      | LG         | RtREV             |
| X       | X            | X       |                       |                   |                             |                  | 111266      | LG         | RtREV             |
| X       | X            |         |                       |                   |                             |                  | 111270      | LG         | RtREV             |
| X       | X            | X       | X                     | X                 | rps-17                      | S17              | 111274      | LG         | RtREV             |
| X       | X            | X       |                       |                   |                             |                  | 111275      | LG         | JTT               |
| X       | X            | X       | X                     | X                 | rps-11                      | S11              | 111277      | LG         | RtREV             |
| X       | X            | X       |                       |                   |                             |                  | 111278      | LG         | RtREV             |
| X       | X            |         |                       |                   |                             |                  | 111279      | LG         | RtREV             |
| X       | X            | X       |                       |                   |                             |                  | 111280      | LG         | WAG               |
| X       |              | X       |                       |                   |                             |                  | 111285      | LG         | RtREV             |
| X       | X            | X       | X                     |                   |                             |                  | 111286      | LG         | WAG               |
| X       | X            | X       | X                     |                   |                             |                  | 111287      | LG         | WAG               |
| X       | X            | X       |                       |                   |                             |                  | 111290      | LG         | JTT               |
| X       |              | X       |                       |                   |                             |                  | 111291      | LG         | RtREV             |
| X       | X            | X       |                       |                   |                             |                  | 111295      | LG         | RtREV             |
| X       | X            |         |                       |                   |                             |                  | 111296      | LG         | JTT               |
| X       |              |         |                       |                   |                             |                  | 111297      | LG         | Blosum62          |
| X       | X            |         |                       |                   |                             |                  | 111298      | LG         | JTT               |
| X       | X            | X       |                       |                   |                             |                  | 111299      | LG         | WAG               |
| X       | X            | X       | X                     |                   |                             |                  | 111305      | LG         | CpREV             |
| X       | X            | X       |                       |                   |                             |                  | 111309      | LG         | RtREV             |

| mintax4 | mintax4_slow | mintax8 | most purposive subset | ribosomal protein | <i>C. elegans</i> gene name | corresponding RP | Ortholog ID | Best Model | second best model |
|---------|--------------|---------|-----------------------|-------------------|-----------------------------|------------------|-------------|------------|-------------------|
| X       |              | X       |                       |                   |                             |                  | 111313      | LG         | WAG               |
| X       | X            |         |                       |                   |                             |                  | 111315      | LG         | JTT               |
| X       | X            | X       |                       |                   |                             |                  | 111316      | LG         | RtREV             |
| X       |              | X       | X                     | X                 | rpl-28                      | L28              | 111318      | LG         | WAG               |
| X       |              | X       |                       |                   |                             |                  | 111328      | RtREV      | LG                |
| X       |              |         |                       |                   |                             |                  | 111331      | LG         | RtREV             |
| X       |              |         |                       |                   |                             |                  | 111334      | Blosum62   | LG                |
| X       | X            | X       |                       |                   |                             |                  | 111335      | WAG        | LG                |
| X       |              |         |                       |                   |                             |                  | 111344      | LG         | RtREV             |
| X       | X            | X       |                       |                   |                             |                  | 111345      | LG         | RtREV             |
| X       | X            | X       | X                     |                   |                             |                  | 111347      | WAG        | LG                |
| X       | X            | X       |                       |                   |                             |                  | 111349      | LG         | WAG               |
| X       | X            |         |                       |                   |                             |                  | 111350      | LG         | RtREV             |
| X       | X            |         |                       |                   |                             |                  | 111352      | LG         | Blosum62          |
| X       | X            |         |                       |                   |                             |                  | 111356      | LG         | JTT               |
| X       | X            |         |                       |                   |                             |                  | 111357      | Blosum62   | LG                |
| X       | X            | X       |                       |                   |                             |                  | 111367      | LG         | Blosum62          |
| X       |              |         |                       |                   |                             |                  | 111376      | LG         | RtREV             |
| X       |              |         |                       |                   |                             |                  | 111377      | VT         | Blosum62          |
| X       | X            |         |                       |                   |                             |                  | 111379      | LG         | JTT               |
| X       |              | X       |                       |                   |                             |                  | 111388      | LG         | CpREV             |
| X       | X            | X       |                       |                   |                             |                  | 111393      | LG         | CpREV             |
| X       | X            | X       | X                     | X                 | rpl-11.2                    | L11              | 111394      | LG         | WAG               |
| X       |              |         |                       |                   |                             |                  | 111395      | LG         | WAG               |
| X       | X            | X       |                       |                   |                             |                  | 111399      | LG         | WAG               |
| X       | X            | X       | X                     |                   |                             |                  | 111405      | LG         | RtREV             |
| X       | X            | X       | X                     |                   |                             |                  | 111413      | LG         | RtREV             |
| X       | X            | X       |                       |                   |                             |                  | 111414      | LG         | WAG               |
| X       |              |         |                       |                   |                             |                  | 111419      | WAG        | LG                |
| X       | X            | X       |                       |                   |                             |                  | 111421      | LG         | RtREV             |
| X       |              | X       | X                     |                   |                             |                  | 111423      | LG         | RtREV             |
| X       | X            |         |                       |                   |                             |                  | 111425      | VT         | Blosum62          |
| X       | X            | X       |                       |                   |                             |                  | 111426      | LG         | RtREV             |
| X       |              | X       |                       |                   |                             |                  | 111427      | LG         | RtREV             |
| X       |              | X       | X                     |                   |                             |                  | 111429      | LG         | RtREV             |
| X       |              | X       |                       |                   |                             |                  | 111430      | LG         | WAG               |
| X       | X            | X       |                       |                   |                             |                  | 111432      | LG         | RtREV             |
| X       | X            | X       | X                     |                   |                             |                  | 111435      | LG         | WAG               |
| X       |              | X       |                       |                   |                             |                  | 111436      | RtREV      | LG                |
| X       | X            |         |                       |                   |                             |                  | 111444      | LG         | RtREV             |
| X       | X            |         |                       |                   |                             |                  | 111448      | LG         | Blosum62          |
| X       | X            | X       | X                     |                   |                             |                  | 111451      | LG         | RtREV             |

| mintax4 | mintax4_slow | mintax8 | most purpositive subset | ribosomal protein | <i>C. elegans</i> gene name | corresponding RP | Ortholog ID | Best Model | second best model |
|---------|--------------|---------|-------------------------|-------------------|-----------------------------|------------------|-------------|------------|-------------------|
| X       | X            | X       | X                       |                   |                             |                  | 111457      | JTT        | LG                |
| X       | X            |         |                         |                   |                             |                  | 111459      | RtREV      | LG                |
| X       | X            |         |                         |                   |                             |                  | 111463      | LG         | WAG               |
| X       | X            | X       | X                       | X                 | rps-18                      | S18              | 111466      | LG         | RtREV             |
| X       | X            | X       |                         |                   |                             |                  | 111469      | LG         | RtREV             |
| X       |              |         |                         |                   |                             |                  | 111471      | JTT        | LG                |
| X       | X            | X       |                         |                   |                             |                  | 111475      | LG         | RtREV             |
| X       |              |         |                         |                   |                             |                  | 111481      | LG         | RtREV             |
| X       |              |         |                         |                   |                             |                  | 111483      | LG         | VT                |
| X       | X            | X       | X                       |                   |                             |                  | 111485      | LG         | RtREV             |
| X       | X            | X       | X                       | X                 | rpl-13                      | L13              | 111491      | LG         | RtREV             |
| X       |              |         |                         |                   |                             |                  | 111493      | LG         | WAG               |
| X       | X            | X       | X                       |                   |                             |                  | 111496      | LG         | RtREV             |
| X       | X            | X       |                         |                   |                             |                  | 111497      | LG         | RtREV             |
| X       | X            |         |                         |                   |                             |                  | 111501      | LG         | RtREV             |
| X       | X            | X       |                         |                   |                             |                  | 111504      | LG         | RtREV             |
| X       | X            |         |                         |                   |                             |                  | 111507      | LG         | Blosum62          |
| X       |              |         |                         |                   |                             |                  | 111509      | LG         | CpREV             |
| X       | X            | X       | X                       |                   |                             |                  | 111510      | LG         | RtREV             |
| X       | X            | X       |                         |                   |                             |                  | 111516      | LG         | RtREV             |
| X       |              |         |                         |                   |                             |                  | 111518      | LG         | RtREV             |
| X       | X            | X       | X                       |                   |                             |                  | 111519      | LG         | RtREV             |
| X       |              | X       |                         |                   |                             |                  | 111521      | LG         | RtREV             |
| X       |              | X       |                         |                   |                             |                  | 111525      | LG         | JTT               |
| X       | X            | X       | X                       |                   |                             |                  | 111527      | LG         | JTT               |
| X       | X            | X       | X                       |                   |                             |                  | 111532      | LG         | CpREV             |
| X       |              |         |                         |                   |                             |                  | 111535      | CpREV      | LG                |
| X       | X            | X       | X                       |                   |                             |                  | 111538      | Blosum62   | RtREV             |
| X       | X            | X       |                         |                   |                             |                  | 111539      | LG         | RtREV             |
| X       | X            | X       |                         |                   |                             |                  | 111542      | LG         | RtREV             |
| X       |              | X       |                         |                   |                             |                  | 111544      | LG         | JTT               |
| X       | X            | X       | X                       | X                 | rpl-21                      | L21              | 111546      | LG         | RtREV             |
| X       | X            |         |                         |                   |                             |                  | 111553      | LG         | RtREV             |
| X       | X            | X       | X                       | X                 | rpl-43                      | L37A             | 111555      | LG         | RtREV             |
| X       | X            |         |                         |                   |                             |                  | 111558      | LG         | RtREV             |
| X       | X            |         |                         |                   |                             |                  | 111560      | LG         | RtREV             |
| X       | X            |         |                         |                   |                             |                  | 111561      | LG         | WAG               |
| X       | X            | X       | X                       |                   |                             |                  | 111566      | LG         | RtREV             |
| X       | X            | X       |                         |                   |                             |                  | 111568      | LG         | WAG               |
| X       |              |         |                         |                   |                             |                  | 111570      | LG         | RtREV             |
| X       | X            | X       |                         |                   |                             |                  | 111572      | LG         | RtREV             |
| X       |              | X       |                         |                   |                             |                  | 111576      | JTT        | LG                |

| mintax4 | mintax4_slow | mintax8 | most purposive subset | ribosomal protein | <i>C. elegans</i> gene name | corresponding RP | Ortholog ID | Best Model | second best model |
|---------|--------------|---------|-----------------------|-------------------|-----------------------------|------------------|-------------|------------|-------------------|
| X       | X            |         |                       |                   |                             |                  | 111579      | LG         | JTT               |
| X       |              |         |                       |                   |                             |                  | 111583      | LG         | RtREV             |
| X       | X            | X       | X                     |                   |                             |                  | 111585      | LG         | WAG               |
| X       | X            | X       | X                     | X                 | rps-7                       | S7               | 111587      | LG         | RtREV             |
| X       |              |         |                       |                   |                             |                  | 111588      | JTT        | LG                |
| X       | X            | X       | X                     | X                 | rps-9                       | S9               | 111595      | LG         | JTT               |
| X       |              | X       |                       |                   |                             |                  | 111596      | LG         | WAG               |
| X       | X            | X       |                       |                   |                             |                  | 111598      | LG         | RtREV             |
| X       | X            | X       |                       | X                 | rpl-23                      | L23              | 111599      | RtREV      | LG                |
| X       |              | X       |                       |                   |                             |                  | 111600      | LG         | Blosum62          |
| X       | X            | X       |                       |                   |                             |                  | 111603      | LG         | Dayhoff           |
| X       | X            | X       |                       |                   |                             |                  | 111604      | LG         | Dayhoff           |
| X       | X            |         |                       |                   |                             |                  | 111607      | LG         | RtREV             |
| X       | X            | X       | X                     |                   |                             |                  | 111608      | VT         | LG                |
| X       |              |         |                       |                   |                             |                  | 111611      | LG         | RtREV             |
| X       | X            | X       |                       |                   |                             |                  | 111618      | LG         | WAG               |
| X       | X            |         |                       |                   |                             |                  | 111619      | LG         | WAG               |
| X       |              | X       |                       |                   |                             |                  | 111620      | LG         | RtREV             |
| X       | X            | X       | X                     | X                 | rpl-22                      | L22              | 111622      | LG         | WAG               |
| X       | X            | X       |                       |                   |                             |                  | 111623      | LG         | WAG               |
| X       | X            | X       |                       |                   |                             |                  | 111625      | JTT        | LG                |
| X       | X            | X       | X                     |                   |                             |                  | 111626      | LG         | RtREV             |
| X       |              | X       |                       |                   |                             |                  | 111628      | LG         | WAG               |
| X       | X            | X       |                       |                   |                             |                  | 111629      | LG         | WAG               |
| X       | X            | X       |                       |                   |                             |                  | 111631      | LG         | RtREV             |
| X       | X            |         |                       |                   |                             |                  | 111634      | LG         | RtREV             |
| X       | X            | X       |                       |                   |                             |                  | 111636      | LG         | RtREV             |
| X       |              | X       |                       |                   |                             |                  | 111639      | RtREV      | LG                |
| X       | X            | X       |                       |                   |                             |                  | 111643      | LG         | JTT               |
| X       | X            |         |                       |                   |                             |                  | 111647      | LG         | RtREV             |
| X       | X            | X       | X                     |                   |                             |                  | 111648      | LG         | RtREV             |
| X       |              | X       |                       |                   |                             |                  | 111653      | LG         | CpREV             |
| X       |              |         |                       |                   |                             |                  | 111654      | WAG        | LG                |
| X       | X            | X       | X                     |                   |                             |                  | 111657      | LG         | RtREV             |
| X       | X            | X       |                       |                   |                             |                  | 111661      | LG         | Dayhoff           |
| X       | X            | X       |                       |                   |                             |                  | 111668      | LG         | JTT               |
| X       | X            | X       |                       |                   |                             |                  | 111676      | CpREV      | LG                |
| X       | X            | X       |                       |                   |                             |                  | 111677      | JTT        | WAG               |
| X       | X            | X       | X                     |                   |                             |                  | 111678      | LG         | WAG               |
| X       |              |         |                       |                   |                             |                  | 111679      | LG         | Blosum62          |
| X       | X            | X       |                       |                   |                             |                  | 111681      | WAG        | Dayhoff           |
| X       | X            | X       |                       |                   |                             |                  | 111686      | LG         | JTT               |

| mintax4 | mintax4_slow | mintax8 | most purposive subset | ribosomal protein | <i>C. elegans</i> gene name | corresponding RP | Ortholog ID | Best Model | second best model |
|---------|--------------|---------|-----------------------|-------------------|-----------------------------|------------------|-------------|------------|-------------------|
| X       |              | X       |                       |                   |                             |                  | 111699      | VT         | LG                |
| X       | X            |         |                       |                   |                             |                  | 111701      | LG         | RtREV             |
| X       | X            | X       | X                     | X                 | rpl-35                      | L35              | 111702      | LG         | RtREV             |
| X       | X            | X       |                       |                   |                             |                  | 111707      | LG         | CpREV             |
| X       | X            | X       | X                     | X                 | rpl-24.1                    | L24              | 111711      | LG         | RtREV             |
| X       | X            | X       |                       |                   |                             |                  | 111723      | LG         | JTT               |
| X       |              |         |                       |                   |                             |                  | 111729      | LG         | WAG               |
| X       | X            | X       | X                     |                   |                             |                  | 111730      | LG         | JTT               |
| X       | X            | X       |                       |                   |                             |                  | 111731      | LG         | RtREV             |
| X       | X            | X       | X                     | X                 | rpl-31                      | L31              | 111733      | LG         | RtREV             |
| X       | X            | X       |                       |                   |                             |                  | 111734      | WAG        | LG                |
| X       | X            | X       |                       |                   |                             |                  | 111738      | RtREV      | LG                |
| X       | X            | X       |                       |                   |                             |                  | 111741      | LG         | JTT               |
| X       | X            | X       | X                     | X                 | rpl-10                      | L10              | 111744      | LG         | RtREV             |
| X       |              |         |                       |                   |                             |                  | 111747      | LG         | RtREV             |
| X       | X            |         |                       |                   |                             |                  | 111749      | LG         | WAG               |
| X       | X            | X       |                       |                   |                             |                  | 111763      | LG         | WAG               |
| X       | X            | X       |                       |                   |                             |                  | 111768      | LG         | RtREV             |
| X       |              |         |                       |                   |                             |                  | 111770      | LG         | Blosum62          |
| X       | X            | X       | X                     | X                 | rpl-4                       | L4               | 111775      | LG         | RtREV             |
| X       | X            |         |                       |                   |                             |                  | 111776      | JTT        | WAG               |
| X       | X            |         |                       |                   |                             |                  | 111777      | LG         | WAG               |
| X       | X            |         |                       |                   |                             |                  | 111778      | LG         | RtREV             |
| X       | X            | X       |                       |                   |                             |                  | 111781      | RtREV      | LG                |
| X       |              |         |                       |                   |                             |                  | 111784      | LG         | RtREV             |
| X       | X            |         |                       |                   |                             |                  | 111786      | LG         | RtREV             |
| X       | X            | X       |                       |                   |                             |                  | 111787      | LG         | RtREV             |
| X       | X            | X       |                       |                   |                             |                  | 111789      | JTT        | Dayhoff           |
| X       |              |         |                       |                   |                             |                  | 111792      | LG         | JTT               |
| X       |              |         |                       |                   |                             |                  | 111795      | LG         | WAG               |
| X       | X            | X       |                       |                   |                             |                  | 111796      | LG         | RtREV             |
| X       | X            | X       |                       |                   |                             |                  | 111797      | LG         | RtREV             |
| X       | X            | X       |                       |                   |                             |                  | 111803      | LG         | RtREV             |
| X       | X            |         |                       |                   |                             |                  | 111807      | LG         | WAG               |
| X       | X            | X       |                       |                   |                             |                  | 111812      | LG         | Blosum62          |
| X       | X            | X       | X                     | X                 | rpl-17                      | L17              | 111814      | LG         | JTT               |
| X       | X            | X       | X                     | X                 | rps-22                      | S15A             | 111815      | LG         | RtREV             |
| X       | X            |         |                       |                   |                             |                  | 111816      | Dayhoff    | DCMut             |
| X       | X            |         |                       |                   |                             |                  | 111818      | LG         | JTT               |
| X       | X            |         |                       |                   |                             |                  | 111820      | LG         | RtREV             |
| X       |              |         |                       |                   |                             |                  | 111825      | LG         | WAG               |
| X       |              |         |                       |                   |                             |                  | 111828      | LG         | RtREV             |

| mintax4 | mintax4_slow | mintax8 | most purposive subset | ribosomal protein | <i>C. elegans</i> gene name | corresponding RP | Ortholog ID | Best Model | second best model |
|---------|--------------|---------|-----------------------|-------------------|-----------------------------|------------------|-------------|------------|-------------------|
| X       | X            | X       | X                     |                   |                             |                  | 111829      | LG         | Blosum62          |
| X       | X            | X       | X                     | X                 | rps-27                      | S27              | 111830      | DCMut*     | Dayhoff           |
| X       |              |         |                       |                   |                             |                  | 111841      | LG         | RtREV             |
| X       | X            |         |                       |                   |                             |                  | 111844      | LG         | RtREV             |
| X       |              | X       | X                     |                   |                             |                  | 111848      | LG         | Blosum62          |
| X       |              | X       |                       |                   |                             |                  | 111849      | LG         | RtREV             |
| X       | X            |         |                       |                   |                             |                  | 111857      | LG         | RtREV             |
| X       |              |         |                       |                   |                             |                  | 111860      | LG         | Blosum62          |
| X       | X            | X       |                       |                   |                             |                  | 111861      | LG         | JTT               |
| X       | X            | X       |                       |                   |                             |                  | 111863      | RtREV      | LG                |
| X       |              | X       | X                     |                   |                             |                  | 111865      | LG         | CpREV             |
| X       | X            | X       | X                     |                   |                             |                  | 111866      | CpREV      | LG                |
| X       | X            | X       |                       |                   |                             |                  | 111870      | LG         | RtREV             |
| X       | X            | X       | X                     | X                 | rpl-7                       | L7               | 111873      | LG         | RtREV             |
| X       | X            |         |                       |                   |                             |                  | 111874      | LG         | RtREV             |
| X       | X            | X       |                       |                   |                             |                  | 111889      | LG         | JTT               |
| X       | X            |         |                       |                   |                             |                  | 111893      | Blosum62   | LG                |
| X       | X            |         |                       |                   |                             |                  | 111894      | LG         | RtREV             |
| X       | X            | X       | X                     | X                 | rps-8                       | S8               | 111898      | LG         | RtREV             |
| X       |              |         |                       |                   |                             |                  | 111900      | LG         | WAG               |
| X       | X            |         |                       |                   |                             |                  | 111905      | LG         | WAG               |
| X       | X            | X       | X                     | X                 | rps-24                      | S24              | 111917      | LG         | RtREV             |
| X       |              |         |                       |                   |                             |                  | 111923      | LG         | JTT               |
| X       | X            | X       | X                     |                   |                             |                  | 111931      | LG         | RtREV             |
| X       | X            |         |                       |                   |                             |                  | 111932      | LG         | JTT               |
| X       |              | X       | X                     | X                 | rpl-6                       | L6               | 111935      | LG         | WAG               |
| X       |              | X       |                       |                   |                             |                  | 111938      | LG         | RtREV             |
| X       | X            | X       | X                     | X                 | rpl-20                      | L18A             | 111945      | LG         | RtREV             |
| X       | X            | X       |                       |                   |                             |                  | 111948      | LG         | RtREV             |
| X       | X            |         |                       |                   |                             |                  | 111950      | LG         | RtREV             |
| X       | X            | X       |                       |                   |                             |                  | 111951      | LG         | CpREV             |
| X       |              | X       | X                     |                   |                             |                  | 111952      | LG         | Blosum62          |
| X       | X            |         |                       |                   |                             |                  | 111953      | LG         | RtREV             |
| X       | X            | X       |                       |                   |                             |                  | 111956      | LG         | JTT               |
| X       |              | X       |                       |                   |                             |                  | 111958      | LG         | RtREV             |
| X       | X            | X       |                       |                   |                             |                  | 111959      | LG         | JTT               |
| X       | X            | X       |                       |                   |                             |                  | 111960      | LG         | WAG               |
| X       | X            | X       |                       |                   |                             |                  | 111962      | Dayhoff    | DCMut             |
| X       |              |         |                       |                   |                             |                  | 111963      | LG         | Blosum62          |
| X       |              |         |                       |                   |                             |                  | 111967      | RtREV      | LG                |
| X       | X            |         |                       |                   |                             |                  | 111971      | LG         | RtREV             |
| X       |              |         |                       |                   |                             |                  | 111972      | LG         | RtREV             |

| mintax4 | mintax4_slow | mintax8 | most purposive subset | ribosomal protein | <i>C. elegans</i> gene name | corresponding RP | Ortholog ID | Best Model | second best model |
|---------|--------------|---------|-----------------------|-------------------|-----------------------------|------------------|-------------|------------|-------------------|
| X       |              |         |                       |                   |                             |                  | 111978      | RtREV      | LG                |
| X       | X            | X       |                       |                   |                             |                  | 111984      | LG         | RtREV             |
| X       | X            |         |                       | X                 | rps-2                       | S2               | 111988      | RtREV      | LG                |
| X       | X            | X       | X                     | X                 | rpl-7A                      | L7A              | 111989      | LG         | RtREV             |
| X       |              | X       | X                     | X                 | rpl-24.2                    | L24 paralog      | 111992      | LG         | WAG               |
| X       |              | X       |                       |                   |                             |                  | 111995      | LG         | Blosum62          |
| X       | X            | X       | X                     |                   |                             |                  | 111998      | LG         | JTT               |
| X       | X            |         |                       |                   |                             |                  | 112002      | LG         | JTT               |
| X       | X            | X       |                       | X                 | rpl-3                       | L3               | 112003      | RtREV      | LG                |
| X       | X            | X       |                       |                   |                             |                  | 112004      | LG         | WAG               |
| X       |              |         |                       |                   |                             |                  | 112007      | LG         | RtREV             |
| X       | X            | X       |                       |                   |                             |                  | 112012      | LG         | RtREV             |
| X       | X            | X       |                       |                   |                             |                  | 112013      | LG         | WAG               |
| X       |              |         |                       |                   |                             |                  | 112021      | LG         | WAG               |
| X       | X            |         |                       |                   |                             |                  | 112028      | LG         | WAG               |
| X       | X            | X       | X                     |                   |                             |                  | 112029      | LG         | RtREV             |
| X       | X            | X       | X                     |                   |                             |                  | 112034      | LG         | WAG               |
| X       |              | X       | X                     |                   |                             |                  | 112037      | LG         | WAG               |
| X       | X            | X       | X                     | X                 | rpl-2                       | L8               | 112038      | RtREV      | LG                |
| X       |              |         |                       |                   |                             |                  | 112040      | CpREV      | LG                |
| X       | X            |         |                       |                   |                             |                  | 112044      | LG         | WAG               |
| X       | X            |         |                       |                   |                             |                  | 112047      | RtREV      | Blosum62          |
| X       | X            |         |                       |                   |                             |                  | 112056      | LG         | WAG               |
| X       | X            | X       |                       |                   |                             |                  | 112060      | JTT        | LG                |
| X       | X            |         |                       |                   |                             |                  | 112064      | LG         | Dayhoff           |
| X       | X            | X       |                       |                   |                             |                  | 112066      | LG         | JTT               |
| X       | X            | X       | X                     | X                 | rps-1                       | S3A              | 112067      | LG         | RtREV             |
| X       | X            | X       |                       |                   |                             |                  | 112072      | LG         | WAG               |
| X       |              |         |                       |                   |                             |                  | 112082      | CpREV      | JTT               |
| X       | X            | X       |                       |                   |                             |                  | 112083      | LG         | WAG               |
| X       | X            |         |                       |                   |                             |                  | 112087      | LG         | WAG               |
| X       | X            | X       |                       |                   |                             |                  | 112088      | LG         | RtREV             |
| X       |              |         |                       |                   |                             |                  | 112096      | LG         | RtREV             |
| X       | X            |         |                       |                   |                             |                  | 112097      | LG         | WAG               |
| X       | X            | X       | X                     |                   |                             |                  | 112102      | LG         | JTT               |
| X       | X            |         |                       |                   |                             |                  | 112106      | LG         | WAG               |
| X       | X            | X       |                       |                   |                             |                  | 112107      | LG         | RtREV             |
| X       | X            | X       |                       |                   |                             |                  | 112108      | LG         | JTT               |
| X       | X            | X       | X                     | X                 | rpl-14                      | L14              | 112115      | LG         | RtREV             |
| X       | X            | X       |                       |                   |                             |                  | 112123      | Dayhoff    | DCMut             |
| X       | X            | X       |                       |                   |                             |                  | 112124      | JTT        | LG                |
| X       | X            | X       |                       |                   |                             |                  | 112126      | RtREV      | LG                |

| mintax4 | mintax4_slow | mintax8 | most purposive subset | ribosomal protein | <i>C. elegans</i> gene name | corresponding RP | Ortholog ID | Best Model | second best model |
|---------|--------------|---------|-----------------------|-------------------|-----------------------------|------------------|-------------|------------|-------------------|
| X       | X            |         |                       |                   |                             |                  | 112129      | LG         | RtREV             |
| X       | X            | X       |                       |                   |                             |                  | 112130      | LG         | CpREV             |
| X       | X            | X       | X                     |                   |                             |                  | 112137      | LG         | RtREV             |
| X       | X            | X       |                       |                   |                             |                  | 112141      | LG         | RtREV             |
| X       | X            | X       |                       |                   |                             |                  | 112142      | LG         | WAG               |
| X       | X            | X       | X                     |                   |                             |                  | 112144      | LG         | JTT               |
| X       | X            | X       |                       |                   |                             |                  | 112147      | LG         | RtREV             |
| X       | X            | X       |                       |                   |                             |                  | 112156      | LG         | JTT               |
| X       | X            | X       |                       |                   |                             |                  | 112158      | LG         | RtREV             |
| X       | X            | X       |                       |                   |                             |                  | 112160      | LG         | JTT               |
| X       |              |         |                       |                   |                             |                  | 112161      | RtREV      | LG                |
| X       | X            | X       |                       |                   |                             |                  | 112163      | LG         | RtREV             |
| X       | X            | X       |                       |                   |                             |                  | 112164      | LG         | RtREV             |
| X       | X            | X       |                       |                   |                             |                  | 112168      | LG         | WAG               |
| X       | X            | X       |                       |                   |                             |                  | 112169      | LG         | RtREV             |
| X       |              | X       |                       |                   |                             |                  | 112170      | LG         | CpREV             |
| X       |              | X       | X                     | X                 | rpl-29                      | L29              | 112178      | RtREV      | Blosum62          |
| X       | X            | X       | X                     |                   |                             |                  | 112181      | LG         | JTT               |
| X       | X            | X       | X                     |                   |                             |                  | 112182      | LG         | RtREV             |
| X       |              |         |                       |                   |                             |                  | 112184      | Blosum62   | LG                |
| X       |              | X       |                       |                   |                             |                  | 112187      | RtREV      | LG                |
| X       |              |         |                       |                   |                             |                  | 112191      | LG         | WAG               |
| X       | X            | X       | X                     | X                 | rpl-1                       | L10A             | 112195      | LG         | RtREV             |
| X       | X            | X       |                       |                   |                             |                  | 112199      | LG         | RtREV             |
| X       | X            |         |                       |                   |                             |                  | 112201      | LG         | CpREV             |
| X       | X            | X       | X                     | X                 | rps-26                      | S26              | 112202      | LG         | JTT               |
| X       | X            | X       | X                     |                   |                             |                  | 112203      | LG         | JTT               |
| X       | X            | X       | X                     | X                 | rps-6                       | S6               | 112204      | LG         | RtREV             |
| X       |              |         |                       |                   |                             |                  | 112205      | Blosum62   | VT                |
| X       | X            | X       |                       |                   |                             |                  | 112206      | LG         | WAG               |
| X       | X            | X       |                       |                   |                             |                  | 112207      | LG         | Blosum62          |
| X       | X            |         |                       |                   |                             |                  | 112211      | LG         | RtREV             |
| X       | X            | X       |                       |                   |                             |                  | 112214      | LG         | RtREV             |
| X       | X            |         |                       |                   |                             |                  | 112221      | LG         | WAG               |
| X       | X            | X       |                       | X                 | rpl-18                      | L18              | 112223      | LG         | RtREV             |
| X       | X            | X       |                       |                   |                             |                  | 112226      | LG         | WAG               |
| X       | X            |         |                       |                   |                             |                  | 112231      | LG         | RtREV             |
| X       |              | X       |                       |                   |                             |                  | 112233      | CpREV      | LG                |
| X       | X            | X       |                       |                   |                             |                  | 112239      | Blosum62   | LG                |
| X       | X            |         |                       |                   |                             |                  | 112240      | LG         | RtREV             |
| X       | X            | X       | X                     | X                 | rpl-9                       | L9               | 112242      | LG         | RtREV             |
| X       | X            | X       |                       |                   |                             |                  | 112255      | LG         | WAG               |



| mintax4 | mintax4_slow | mintax8 | most purposive subset | ribosomal protein | <i>C. elegans</i> gene name | corresponding RP | Ortholog ID | Best Model | second best model |
|---------|--------------|---------|-----------------------|-------------------|-----------------------------|------------------|-------------|------------|-------------------|
| X       | X            | X       |                       |                   |                             |                  | 112256      | LG         | RtREV             |
| X       | X            | X       |                       |                   |                             |                  | 112258      | LG         | RtREV             |
| X       | X            |         |                       |                   |                             |                  | 112265      | LG         | RtREV             |
| X       |              |         |                       |                   |                             |                  | 112267      | LG         | RtREV             |
| X       | X            | X       | X                     |                   |                             |                  | 112271      | LG         | RtREV             |
| X       | X            | X       |                       |                   |                             |                  | 112281      | LG         | JTT               |
| X       | X            | X       |                       |                   |                             |                  | 112284      | LG         | WAG               |
| X       | X            |         |                       |                   |                             |                  | 112287      | LG         | Blosum62          |
| X       | X            |         |                       |                   |                             |                  | 112288      | RtREV      | LG                |
| X       | X            | X       |                       |                   |                             |                  | 112290      | RtREV      | LG                |
| X       |              | X       | X                     |                   |                             |                  | 112291      | WAG        | LG                |
| X       | X            | X       |                       |                   |                             |                  | 112292      | LG         | RtREV             |
| X       |              | X       |                       |                   |                             |                  | 112293      | LG         | WAG               |
| X       |              |         |                       |                   |                             |                  | 112296      | LG         | JTT               |
| X       | X            | X       |                       |                   |                             |                  | 112297      | JTT        | LG                |
| X       | X            | X       |                       |                   |                             |                  | 112298      | LG         | WAG               |
| X       |              |         |                       |                   |                             |                  | 112299      | LG         | WAG               |
| X       | X            | X       |                       |                   |                             |                  | 112300      | LG         | RtREV             |
| X       | X            | X       | X                     | X                 | rpl-41                      | L41              | 112301      | Dayhoff    | DCMut             |
| X       | X            |         |                       |                   |                             |                  | 112302      | RtREV      | LG                |
| X       | X            | X       | X                     |                   |                             |                  | 112307      | LG         | RtREV             |
| X       |              |         |                       |                   |                             |                  | 112308      | LG         | RtREV             |
| X       | X            | X       |                       |                   |                             |                  | 112310      | LG         | RtREV             |
| X       | X            | X       |                       |                   |                             |                  | 112311      | LG         | CpREV             |
| X       |              |         |                       |                   |                             |                  | 112312      | LG         | WAG               |
| X       | X            | X       |                       |                   |                             |                  | 112315      | LG         | RtREV             |
| X       | X            |         |                       |                   |                             |                  | 112320      | LG         | JTT               |
| X       | X            | X       |                       |                   |                             |                  | 112321      | JTT        | LG                |
| X       | X            | X       | X                     | X                 | rps-20                      | S20              | 112322      | LG         | RtREV             |
| X       | X            | X       |                       |                   |                             |                  | 112324      | RtREV      | LG                |
| X       |              |         |                       |                   |                             |                  | 112325      | LG         | RtREV             |
| X       |              |         |                       |                   |                             |                  | 112330      | LG         | JTT               |
| X       | X            |         |                       |                   |                             |                  | 112337      | LG         | RtREV             |
| X       | X            | X       |                       |                   |                             |                  | 112339      | LG         | WAG               |
| X       | X            |         |                       |                   |                             |                  | 112342      | LG         | RtREV             |
| X       | X            | X       |                       |                   |                             |                  | 112345      | WAG        | VT                |
| X       | X            |         |                       |                   |                             |                  | 112349      | LG         | RtREV             |
| X       | X            | X       |                       |                   |                             |                  | 112350      | LG         | JTT               |
| X       | X            | X       |                       |                   |                             |                  | 112354      | LG         | RtREV             |
| X       | X            | X       | X                     | X                 | rps-5                       | S5               | 112355      | LG         | RtREV             |
| X       | X            | X       | X                     | X                 | rpl-30                      | L30              | 112358      | LG         | RtREV             |
| X       | X            | X       | X                     | X                 | rpl-15                      | L15              | 112359      | LG         | RtREV             |

|   | mintax4 | mintax4_slow | mintax8 | most purpositive subset | ribosomal protein | <i>C. elegans</i> gene name | corresponding RP | Ortholog ID | Best Model | second best model |
|---|---------|--------------|---------|-------------------------|-------------------|-----------------------------|------------------|-------------|------------|-------------------|
| X | X       | X            | X       |                         |                   |                             |                  | 112366      | WAG        | LG                |
| X | X       | X            |         |                         |                   |                             |                  | 112367      | LG         | WAG               |
| X | X       | X            |         |                         |                   |                             |                  | 112371      | RtREV      | LG                |
| X | X       | X            |         |                         |                   |                             |                  | 112372      | LG         | RtREV             |
| X | X       |              |         |                         |                   |                             |                  | 112374      | LG         | RtREV             |
| X | X       |              |         |                         |                   |                             |                  | 112375      | LG         | WAG               |
| X | X       | X            | X       |                         |                   |                             |                  | 112376      | LG         | Dayhoff           |
| X | X       | X            | X       |                         |                   |                             |                  | 112379      | LG         | RtREV             |
| X |         | X            |         |                         |                   |                             |                  | 112380      | LG         | RtREV             |
| X |         |              |         |                         |                   |                             |                  | 112381      | LG         | Blosum62          |
| X | X       | X            |         |                         |                   |                             |                  | 112382      | WAG        | LG                |
| X | X       | X            | X       |                         |                   |                             |                  | 112386      | LG         | RtREV             |
| X | X       |              |         |                         |                   |                             |                  | 112388      | LG         | RtREV             |
| X | X       | X            | X       | X                       | X                 | rpl-36                      | L36              | 112394      | RtREV      | LG                |
| X | X       | X            |         |                         |                   |                             |                  | 112399      | LG         | JTT               |
| X |         | X            |         |                         |                   |                             |                  | 112402      | LG         | RtREV             |
| X |         | X            |         |                         |                   |                             |                  | 112403      | LG         | RtREV             |
| X | X       | X            | X       | X                       | X                 | rps-12                      | S12              | 112414      | LG         | WAG               |
| X | X       | X            |         |                         |                   |                             |                  | 112415      | LG         | RtREV             |
| X | X       | X            | X       | X                       | X                 | rpl-26                      | L26              | 112417      | LG         | RtREV             |
| X | X       |              |         |                         |                   |                             |                  | 112421      | LG         | WAG               |
| X | X       | X            |         |                         |                   |                             |                  | 112422      | LG         | JTT               |
| X | X       |              |         |                         |                   |                             |                  | 112423      | LG         | RtREV             |
| X | X       | X            | X       | X                       | X                 | rpl-27                      | L27              | 112425      | LG         | RtREV             |
| X | X       | X            |         |                         |                   |                             |                  | 112427      | LG         | JTT               |
| X |         |              |         |                         |                   |                             |                  | 112430      | LG         | RtREV             |
| X |         | X            |         |                         |                   |                             |                  | 112432      | LG         | WAG               |
| X | X       | X            | X       |                         |                   |                             |                  | 112433      | LG         | JTT               |
| X | X       | X            | X       | X                       | X                 | rpl-16                      | L13A             | 112436      | LG         | RtREV             |
| X | X       | X            |         |                         |                   |                             |                  | 112438      | LG         | RtREV             |
| X | X       | X            |         |                         |                   |                             |                  | 112443      | LG         | JTT               |
| X | X       | X            | X       |                         |                   |                             |                  | 112448      | LG         | RtREV             |
| X | X       | X            | X       |                         |                   |                             |                  | 112449      | LG         | RtREV             |
| X | X       |              |         |                         |                   |                             |                  | 112450      | LG         | RtREV             |
| X | X       | X            | X       | X                       | X                 | rps-21                      | S21              | 112451      | LG         | Blosum62          |

sum 410 307 272 101 51

\* = special case: always assigned to partition "Dayhoff"
