# Supplementary material for: Transcriptome Data Reveal Syndermatan Relationships and Suggest the Evolution of Endoparasitism in Acanthocephala via an Epizoic Stage
Source: PubMed Central journal article supplement (PMC3919803; doi:10.1371/journal.pone.0088618), 2014-02-10
Supplement: pone.0088618.s005.pdf [file pone.0088618.s005.pdf]

**Table S4 - Support values for internal nodes, position of *Turbanella* and position of *Paraplanocera spec.* and *M. lignano* obtained by all analyses**

S = *Seison*, A = Acanthocephala, B = Bdelloidea, M = Monogononta, Syn = Syndermata, G = Gnathostomulida, T = *Turbanella ambronensis*

\*: possible positions for the gastrotrich *Turbanella ambronensis* ("=*Turbanella*"): 1 = sister to (Platyhelminthes + Syndermata + Gnathostomulida), 2 = sister to Gnathifera, 3 = trichotomy (Mollusca, *Turbanella*, (Platyhelminthes+Gnathifera)), 4 = sister to Platyhelminthes, 5 = clade (*Turbanella* + *Gnathostomula*) sister to Syndermata, 6 = sister to Syndermata, 7 = clade (*Turbanella* + *Gnathostomula*) sister to Platyhelminthes

| Phylogenomic dataset        | program    | number of partitions |           |               |               |            |            | Syn+(G+T) | Position of <i>Turbanella</i> * | Topology of <i>Paraplanocera spec.</i> + <i>M. lignano</i> |
|-----------------------------|------------|----------------------|-----------|---------------|---------------|------------|------------|-----------|---------------------------------|------------------------------------------------------------|
|                             |            |                      | Lerniscea | Pararotatoria | Hemirotrifera | Syndermata | Gnathifera |           |                                 |                                                            |
| mintax4                     | MrBayes    | 7                    | /         | 1,0           | 1,0           | 1,0        | 1,0        | /         | 1                               | Para basal                                                 |
|                             | PhyloBayes | 1                    | /         | 1,0           | 1,0           | 1,0        | 0,84       | /         | 2                               | Macro basal                                                |
|                             | RAxML      | 8                    | /         | 100           | 87            | 100        | 76         | /         | 1                               | Para sister to Macro                                       |
|                             | Treefinder | 8                    | /         | 100           | 82            | 100        | 87         | /         | 3                               | Para sister to Macro                                       |
| mintax4_noRPs               | MrBayes    | 7                    | /         | 1,0           | 1,0           | 1,0        | 1,0        | /         | 4                               | Macro basal                                                |
|                             | PhyloBayes | 1                    | /         | 1,0           | 1,0           | 1,0        | 0,89       | /         | 4                               | Macro basal                                                |
|                             | RAxML      | 8                    | /         | 100           | 97            | 100        | 71         | /         | 4                               | Macro basal                                                |
|                             | Treefinder | 8                    | /         | 99            | 96            | 100        | 90         | /         | 4                               | Macro basal                                                |
| mintax8                     | MrBayes    | 7                    | /         | 1,0           | 1,0           | 1,0        | 1,0        | /         | 1                               | Para basal                                                 |
|                             | PhyloBayes | 1                    | /         | 1,0           | 1,0           | 1,0        | 0,86       | /         | 2                               | Macro basal                                                |
|                             | RAxML      | 8                    | /         | 100           | 96            | 100        | 54         | /         | 1                               | Para sister to Macro                                       |
|                             | Treefinder | 8                    | 0         | /             | 99            | 100        | 56         | /         | 2                               | Para sister to Macro                                       |
| mintax8_noRPs               | MrBayes    | 7                    | /         | 1,0           | 1,0           | 1,0        | 1,0        | /         | 4                               | Macro basal                                                |
|                             | PhyloBayes | 1                    | /         | 1,0           | 1,0           | 1,0        | 0,96       | /         | 4                               | Macro basal                                                |
|                             | RAxML      | 8                    | /         | 100           | 97            | 100        | 80         | /         | 4                               | Macro basal                                                |
|                             | Treefinder | 8                    | /         | 100           | 99            | 100        | 91         | /         | 4                               | Macro basal                                                |
| most purposive subset       | MrBayes    | 1                    | /         | 1,0           | 0,99          | 1,0        | /          | 1,0       | 5                               | Para basal                                                 |
|                             | RAxML      | 1                    | /         | 100           | 49            | 100        | /          | 56        | 5                               | Para basal                                                 |
|                             | Treefinder | 1                    | /         | 100           | 58            | 100        | /          | 73        | 5                               | Para basal                                                 |
| most purposive subset_noRPs | MrBayes    | 1                    | /         | 1,0           | 1,0           | 1,0        | /          | /         | 1                               | Para basal                                                 |
|                             | RAxML      | 1                    | /         | 69            | 47            | 95         | /          | 25        | 5                               | Para basal                                                 |
|                             | Treefinder | 1                    | /         | 91            | 71            | 94         | /          | /         | 6                               | Para basal                                                 |
| mintax4_slow                | RAxML      | 8                    | /         | 99            | 85            | 100        | 79         | /         | 1                               | Para basal                                                 |
| mintax4_4Synd               | RAxML      | 1                    | /         | 68            | 64            | 99         | 65         | /         | 1                               | Para basal                                                 |
| mintax4_4Synd-DS            | RAxML      | 1                    | /         | 86            | 86            | 95         | /          | /         | 7                               | Para basal                                                 |
